# Supplementary material for: Cytosolic delivery of quantum dots mediated by freezing and hydrophobic polyampholytes in RAW 264.7 cells
Source: Royal Society of Chemistry journal article supplement (doi:10.1039/c9tb01184f), 2019-01-01
Supplement: c9tb01184f1.pdf [file c9tb01184f1.pdf]

Electronic Supplementary Information (ESI) for

## **Cytosolic delivery of quantum dots mediated by freezing and hydrophobic polyampholytes in RAW 264.7 cells**

Sana Ahmed<sup>a, b</sup>, Tadashi Nakaji-Hirabayashi<sup>b, c</sup>, Robin Rajan<sup>a</sup>, Dandan Zhao<sup>a</sup> and Kazuaki Matsumura<sup>\*a</sup>

<sup>a</sup>School of Materials Science, Japan Advanced Institute of Science and Technology (JAIST), Nomi, Ishikawa 923-1292, Japan E-mail: mkazuaki@jaist.ac.jp

<sup>b</sup>Graduate School of Science and Engineering, University of Toyama, 3190 Gofuku, Toyama, Toyama 930-8555, Japan

<sup>c</sup>Graduate School of Innovative Life Science, University of Toyama, 3190 Gofuku, Toyama, Toyama 930-8555, Japan

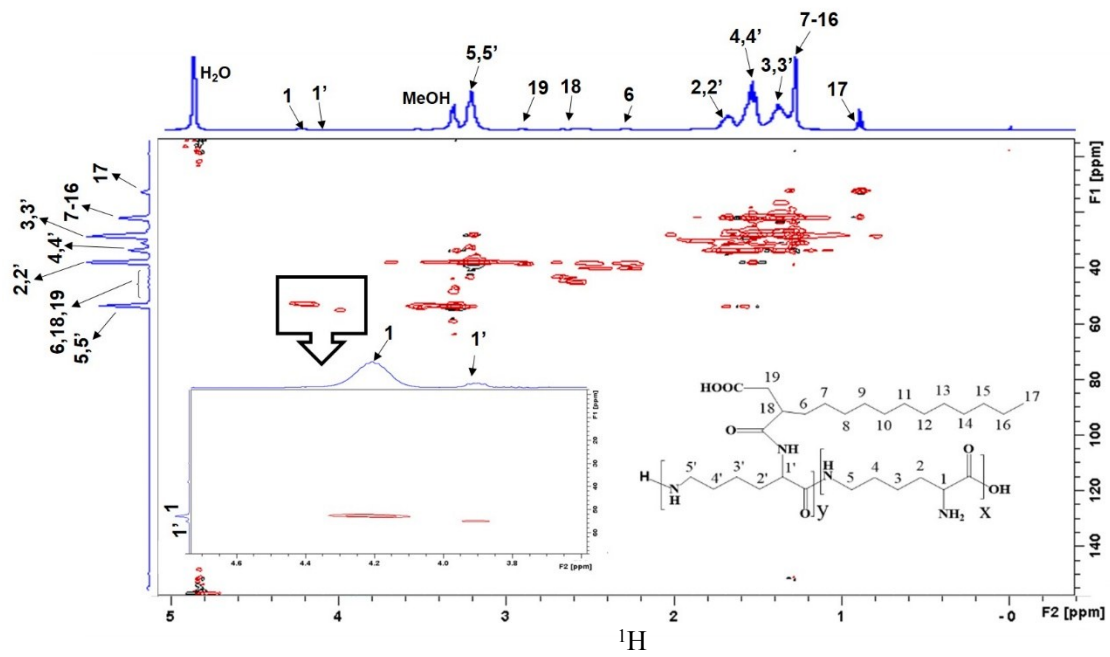

<sup>13</sup>C

**Fig. S1** NMR signal assignment of PLL-DDSA(10) in methanol-d<sub>4</sub>.

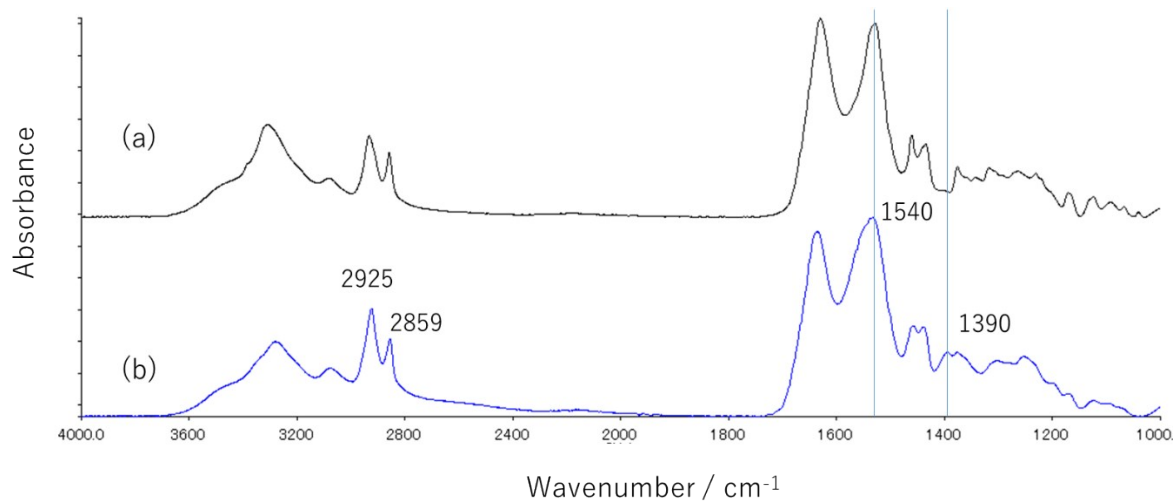

**Fig. S2** ATR-FTIR spectra of (a)  $\epsilon$ -PLL and (b) PLL-DDSA(10).

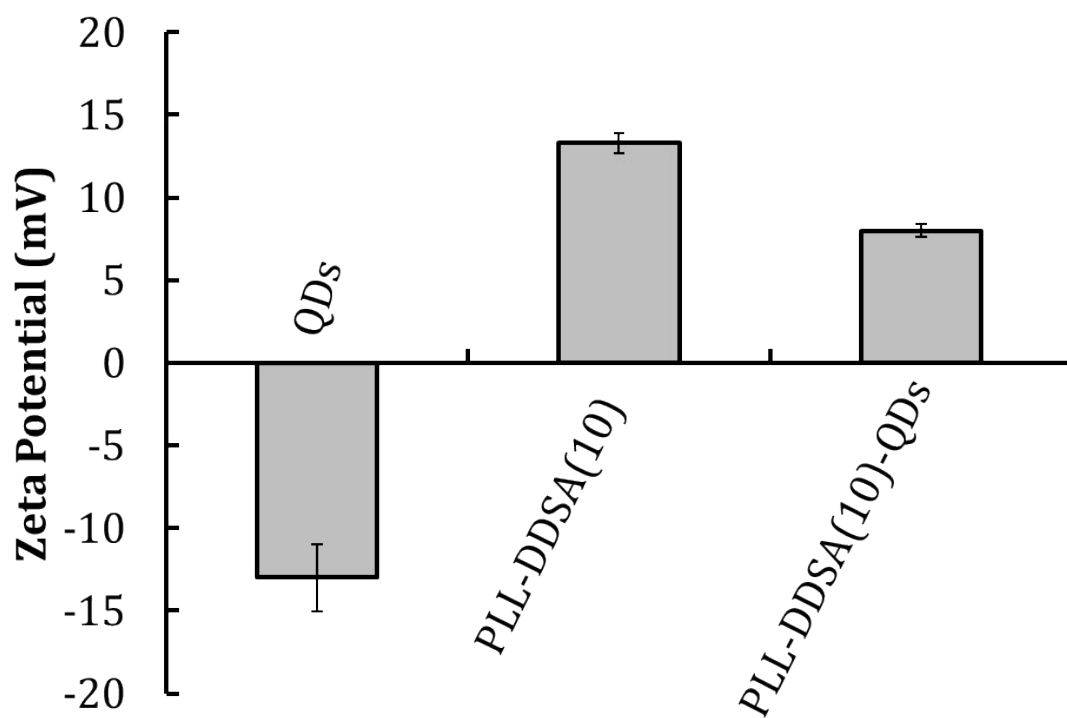

**Fig. S3** Zeta potential of QDs, PLL-DDSA(10), and PLL-DDSA(10)-QDs determined using DLS . Data are expressed as mean  $\pm$  SD.

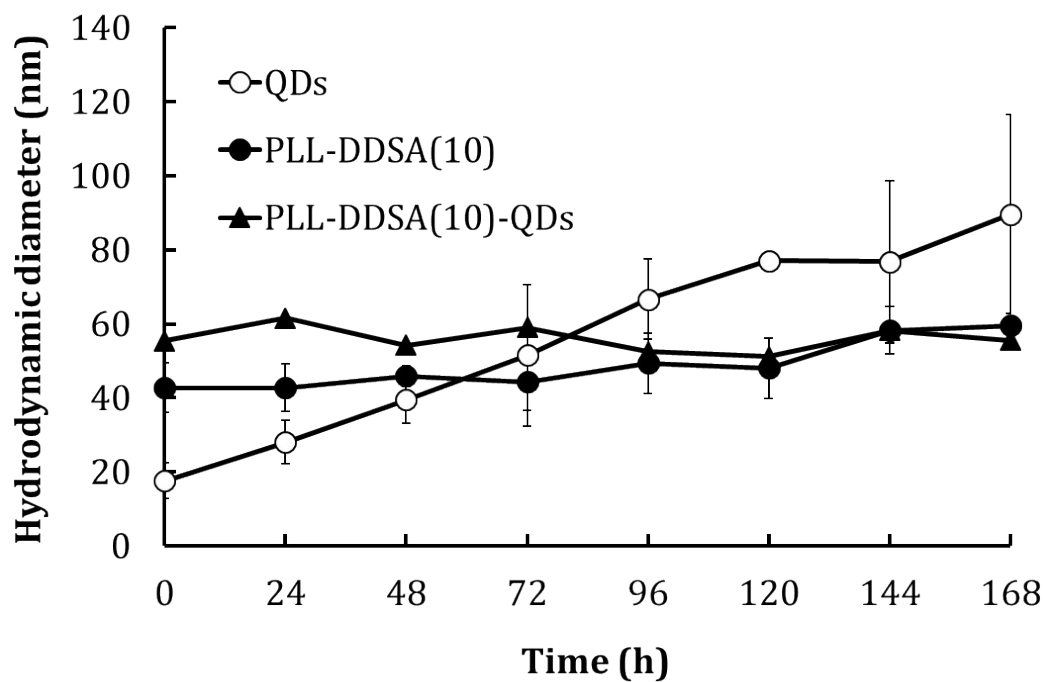

**Fig. S4** Particle size stability of QDs only and PLL-DDSA(10)-QDs over 7 days at 25 °C.

Data are expressed as mean  $\pm$  SD.

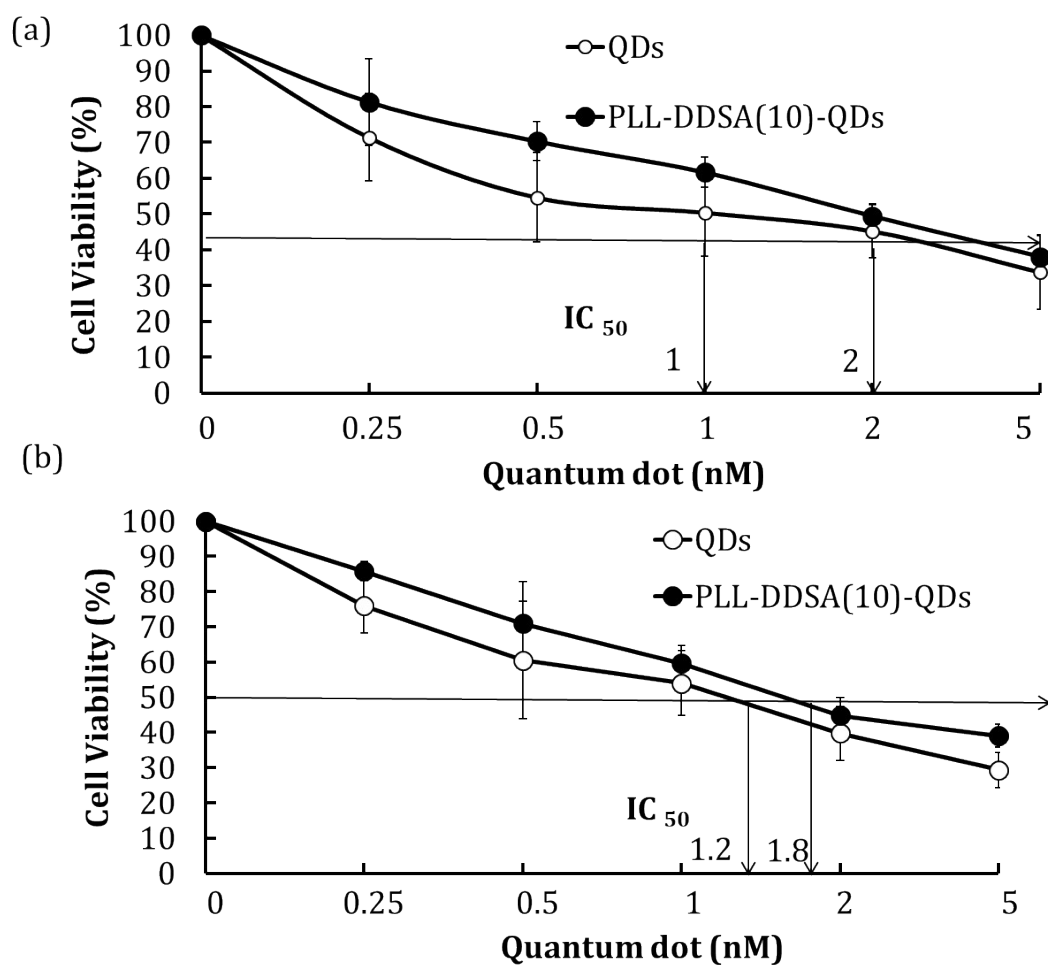

**Fig. S5** Cytotoxicity of QDs alone and PLL-DDSA(10)-QDs in fibroblast L929 cells and RAW 264.7 macrophages. The cells were incubated with different concentration of QDs for 48 h and analysed using MTT. The polyampholyte concentration was fixed, whereas the quantum dot concentration varied from 0 to 5 nM. IC<sub>50</sub> represents the concentration of QDs that caused a 50% reduction in the number of treated cells compared to the untreated control. (a) Fibroblast L929 cells and (b) RAW 264.7 macrophages. Data are expressed as mean  $\pm$  SD.

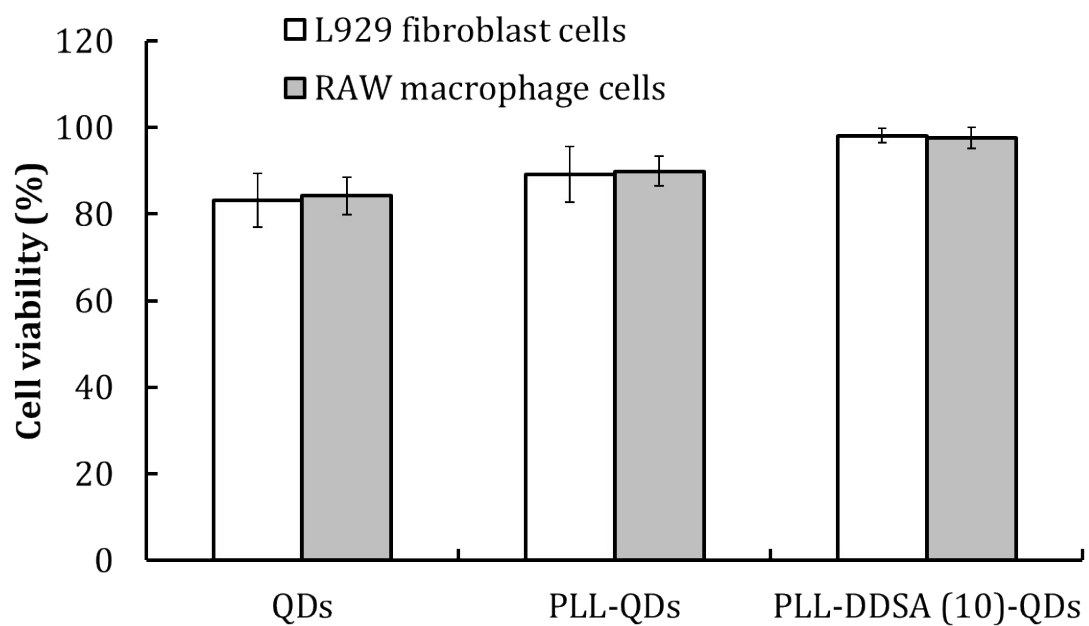

**Fig. S6** Cell viability in the presence of QDs alone or QD complexes with PLL and PLL-DDSA (10) in the presence of a cryoprotectant. Data are expressed as mean  $\pm$  SD.

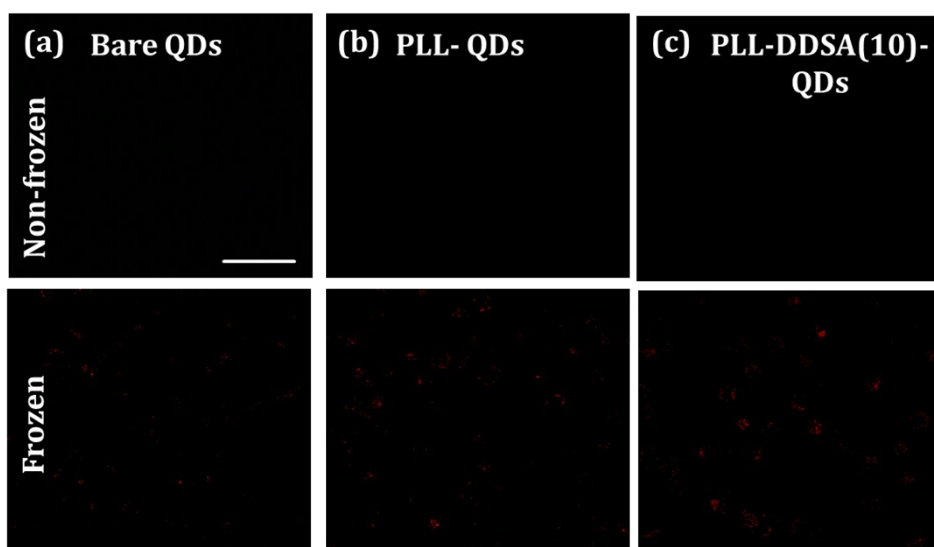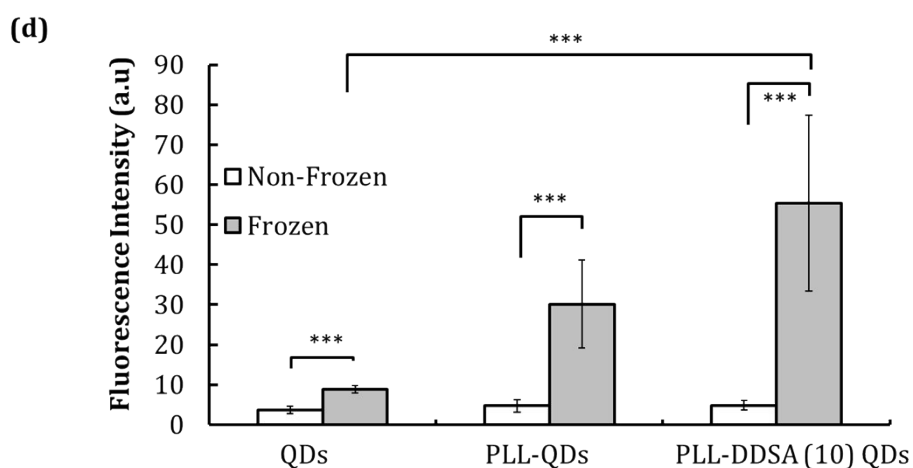

**Fig. S7** Confocal images of L929 fibroblast cells showing the adsorption of QDs after being frozen at  $-80\text{ }^{\circ}\text{C}$  in a cryoprotectant. After 24 h, the cells were thawed at  $37\text{ }^{\circ}\text{C}$  and the adsorption was investigated using confocal microscopy. Scale bar:  $50\text{ }\mu\text{m}$ . The panels show the (a) bare QDs, (b) PLL-QDs, and the (c) PLL-DDSA(10)-QDs. (d) Mean fluorescence intensity of the adsorbed QDs was determined after freezing using CLSM of RAW 264.7 cells. Data are expressed as the mean  $\pm$  SD. \*\*\* $P < 0.001$ .
